# Supplementary material for: Rutin-Loaded Solid Lipid Nanoparticles: Characterization and In Vitro Evaluation
Source: MDPI journal article supplement (doi:10.3390/molecules26041039), 2021-02-16
Supplement: s1 [file s1]

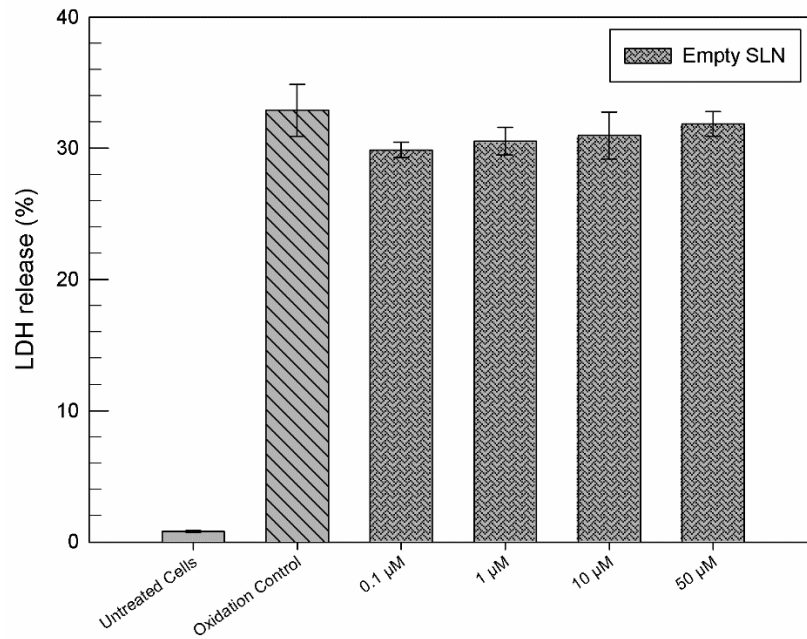

**Figure S1:** Anti-oxidant effect of empty SLN on U373 cells expressed as LDH release reduction. Cells were treated with increased concentration of empty SLN for 24h, then incubated with H<sub>2</sub>O<sub>2</sub> (700 µM) for 1 h. Noteworthy, the empty SLNs concentrations reported in the figure correspond to the amount of RT-SLNs necessary to reach the selected concentration of RT in free form. Results are presented as the mean of three different experiments ± S.D. The error bar, if not shown, was within the bar. The data obtained for empty SLN are not statistically significant with respect to the oxidation control.
